# Supplementary material for: Li10GeP2S12 solid electrolytes synthesised via liquid-phase methods
Source: Royal Society of Chemistry journal article supplement (doi:10.1039/d3cc01018j), 2023-01-01
Supplement: d3cc01018j1.pdf [file d3cc01018j1.pdf]

## Supporting Information

### **Li<sub>10</sub>GeP<sub>2</sub>S<sub>12</sub> Solid Electrolytes Synthesised via Liquid-Phase Methods**

Kazuhiro Hikima,\*<sup>1</sup> Kaito Ogawa,<sup>1</sup> Hirotada Gamo,<sup>1</sup> Atsunori Matsuda\*<sup>1</sup>

<sup>1</sup>*Department of Electrical and Electronic Information Engineering, Toyohashi University of Technology, 1-1 Hibarigaoka, Tempaku-cho, Toyohashi, Aichi 441-8580,*

E-mail: hikima.kazuhiro.ou@tut.jp, matsuda@ee.tut.ac.jp

## Experimental

### *Synthesis*

For the liquid-phase shaking method, a suspension of the solid electrolyte precursor was synthesised using the liquid-phase shaking method described in our previous reports.<sup>21,22</sup> The raw materials, namely, Li<sub>2</sub>S (Mitsuwa Chemicals Co., Ltd., 99.9% purity), P<sub>2</sub>S<sub>5</sub> (Merck Co., Ltd., 99% purity), and GeS<sub>2</sub> (FUJIFILM Wako Pure Chemical Corp., 99.9% purity), were mixed in a molar ratio of 5:1:1 (0.5743, 0.5556, and 0.2615 g, respectively) with 4-mm zirconia balls (approximately 32 g) and 1,2-dimethoxyethane (DME) (10 mL; FUJIFILM Wako Pure Chemical Corp., 99.5% purity) or tetrahydrofuran (THF) (10 mL; Fujifilm Wako Chemicals Co., Ltd., 99.5% purity) in a 45-mL polypropylene centrifugation tube (Labcon North America). The suspension was obtained by shaking the mixture at 1500 rpm for 6 h and then stirring for 72 h at 30 °C, or shaking at 1500 rpm for 6 h at 45 °C. Subsequently, the suspension was evacuated at 90 °C and held for 24 h under vacuum using a rotary vacuum pump (GHD-031A, ULVAC, Inc.). The precursor powder was pelletised (diameter = 10 mm, approximately 100 mg) by uniaxial pressing at 120 MPa and 25 °C. The pellet was placed in a SiO<sub>2</sub> tube; Ar gas was supplied to the tube through the inlet and allowed to pass through the outlet. The precursor pellet was heated at 550 °C for 12 h in a tube furnace, which was developed in previous study.<sup>22</sup> The pellet was thoroughly ground using an agate mortar, and a Li<sub>10</sub>GeP<sub>2</sub>S<sub>12</sub> solid electrolyte powder was obtained.

For the solution processing method, raw materials such as Li<sub>2</sub>S, P<sub>2</sub>S<sub>5</sub>, GeS<sub>2</sub> and elemental sulfur (Sigma-Aldrich, 99.98%) were initially mixed in a molar ratio of 5:1:1:*x* (where *x*= 5-15). The mixed powder (2 g) was added into a mixed solvent (20 mL) consisting of ACN (FUJIFILM Wako Pure Chemical Corp., 99.5% purity), THF, and EtOH (Konishi Chemical Ind. Co. Ltd., 99.5% purity) in a volume ratio of 1:1:0.05, respectively. The solvent mixture was stirred and dissolved for 30 min. The obtained solution was vacuum-

dried at 130 °C for 1 h, and then subjected to heat treatment in a tube furnace at 350, 450, or 550 °C for 6 or 12 h to obtain  $\text{Li}_{10}\text{GeP}_2\text{S}_{12}$  solid electrolyte powder; the equipment was the same as that used for the liquid-phase shaking method. Excess sulfur evaporated through the heat treatment. All solvents were used after water removal treatment with molecular sieves.

### *Characterization*

The chemical species in the precursor solution were examined by UV–Vis spectrophotometry (Jasco V-670). The crystal structures were characterised using X-ray diffraction (XRD, Smartlab SE, Rigaku). The samples were sealed in holders (Rigaku) in an Ar-filled glove box. The particle size and morphology were evaluated using scanning electron microscopy (SEM; S-4800, Hitachi High-Tech). The ionic conductivity of the solid electrolytes was investigated using electrochemical impedance spectroscopy (EIS) (SI 1260A, Solartron Analytical or HZ-Pro, Hokuto) in the frequency range of 1 MHz to 10 Hz under a dry Ar flow. The EIS samples were prepared by uniaxially pressing the samples (100 mg) into pellets at a pressure of 254 MPa. The electronic conductivity of the solid electrolytes was measured using a direct-current polarisation technique (Hz-Pro; Hokuto Denko).

Supporting Figure

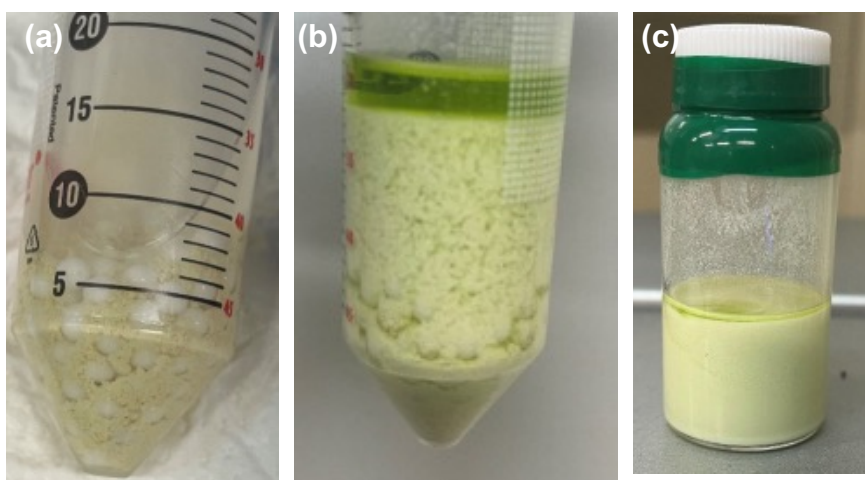

Figure S1. Photographs of  $\text{Li}_{10}\text{GeP}_2\text{S}_{12}$  solid electrolyte precursors synthesised using 1,2-dimethoxyethane as solvent (a) before shaking, (b) after shaking for 6 h, and (c) after stirring for 72 h.

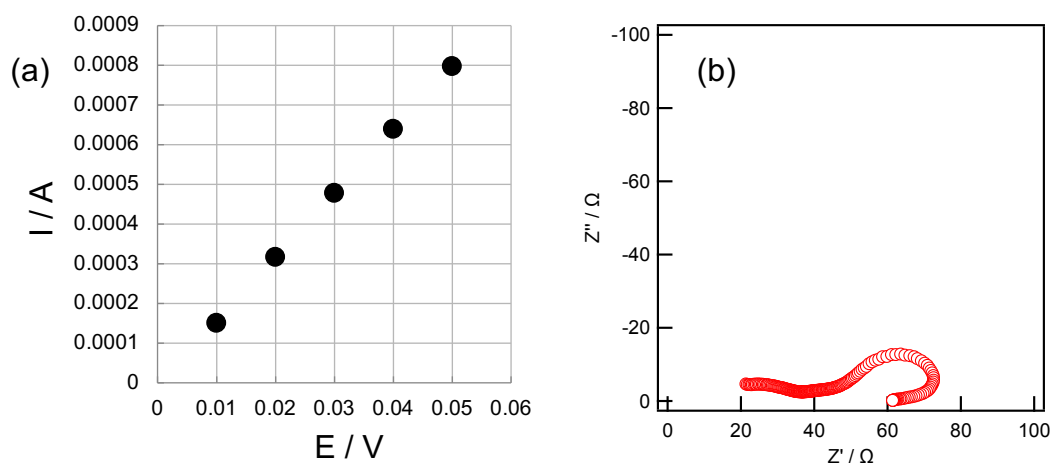

Figure S2. (a) DC polarization test results and (b) Nyquist plot of  $\text{Li}_{10}\text{GeP}_2\text{S}_{12}$  solid electrolyte at 25 °C. The sample was synthesised using 1,2-dimethoxyethane (DME) as solvent by shaking at 30 °C.

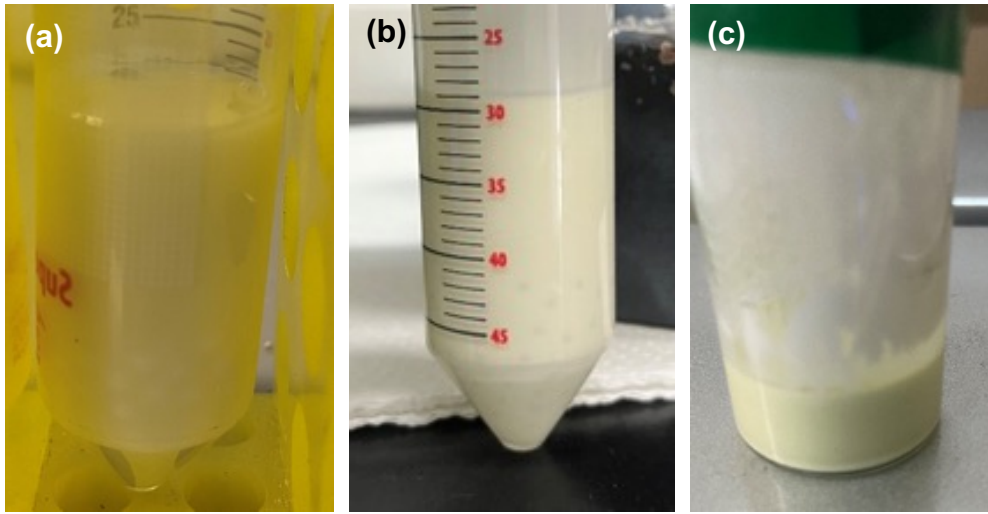

Figure S3. Photographs of  $\text{Li}_{10}\text{GeP}_2\text{S}_{12}$  solid electrolyte precursors synthesised with tetrahydrofuran as solvent (a) before shaking, (b) after shaking for 6 h, and (c) after stirring for 72 h.

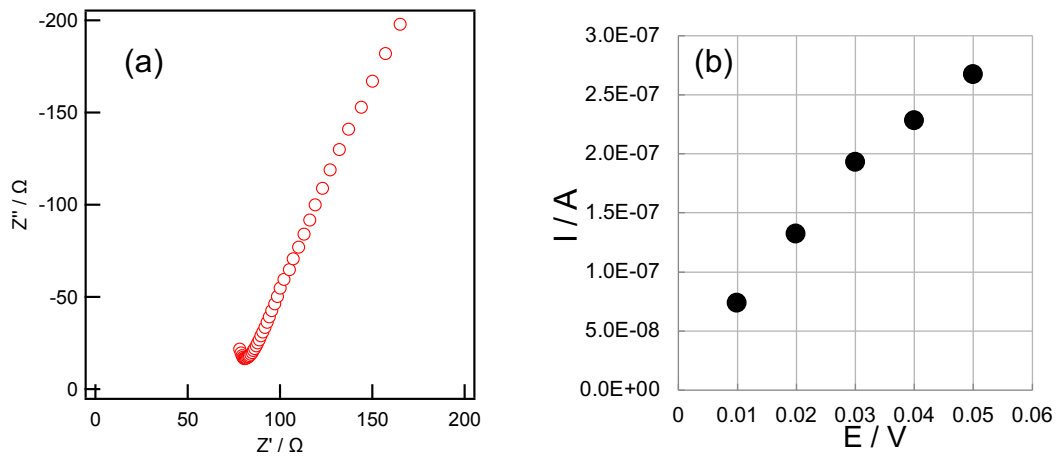

Figure S4. Nyquist plot and (b) DC polarization test results of  $\text{Li}_{10}\text{GeP}_2\text{S}_{12}$  solid electrolyte at 25 °C. The sample was synthesised using tetrahydrofuran (THF) as solvent by shaking at 30 °C.

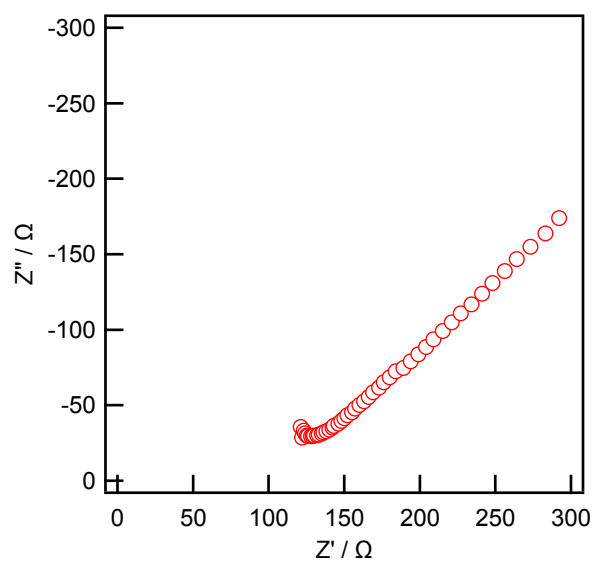

Figure S5. Nyquist plot of  $\text{Li}_{10}\text{GeP}_2\text{S}_{12}$  solid electrolyte at 25 °C.  $\text{Li}_{10}\text{GeP}_2\text{S}_{12}$  solid electrolyte was synthesised using tetrahydrofuran (THF) as solvent by shaking at 45 °C.

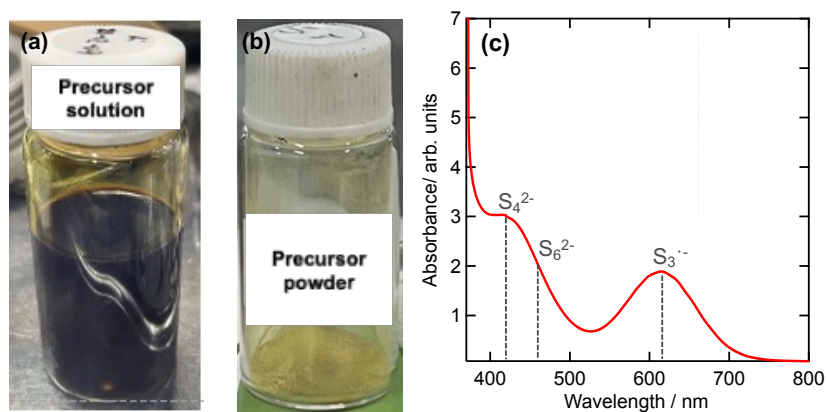

Figure S6. Photographs of  $\text{Li}_{10}\text{GeP}_2\text{S}_{12}$  solid electrolyte precursors synthesised via solution processing involving dynamic sulfide radical anions (a) after stirring for 30 min and (b) after drying, and (c) UV-Vis spectra of  $\text{Li}_{10}\text{GeP}_2\text{S}_{12}$  solutions at  $0.5 \text{ mmol L}^{-1}$  in the mixed solvent containing ACN and THF a trace amount of EtOH.

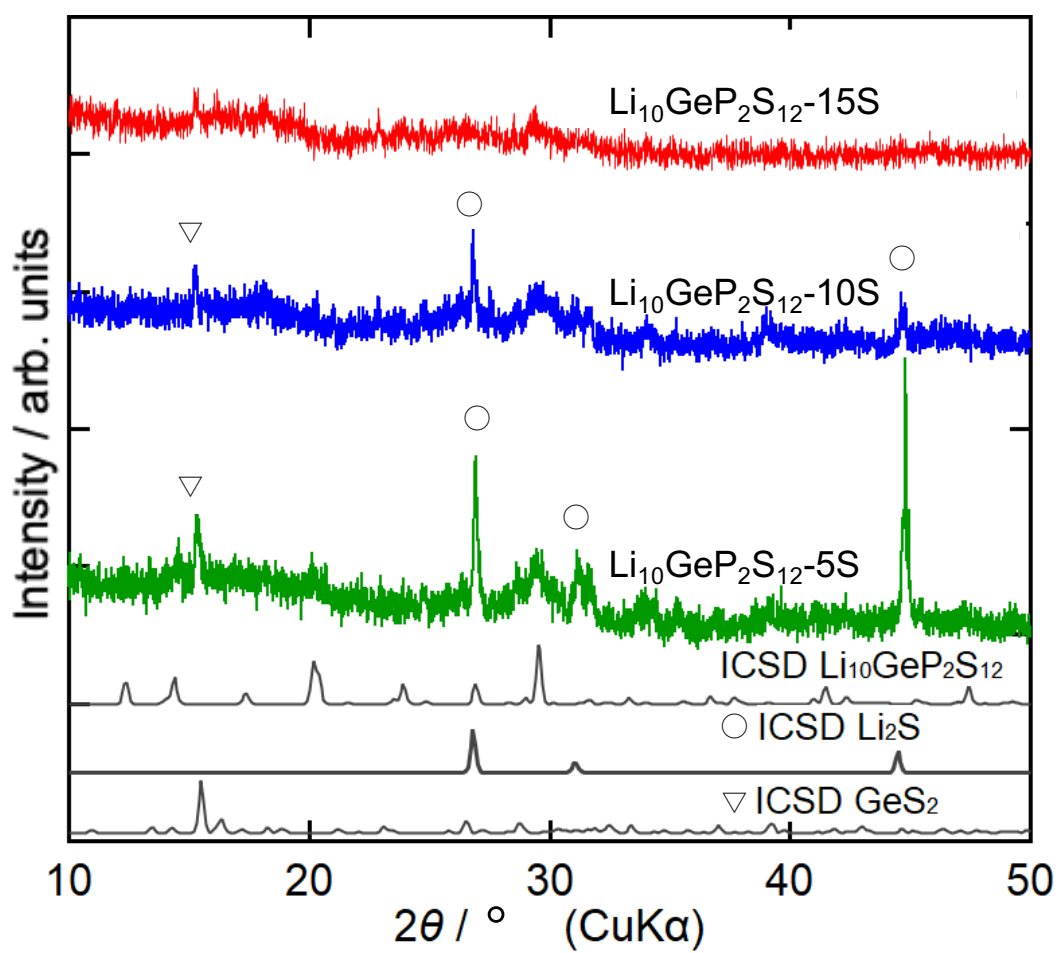

Figure S7. Powder X-ray diffraction (XRD) patterns of  $\text{Li}_{10}\text{GeP}_2\text{S}_{12-x}\text{S}$  precursors with  $x = 5-15$ .

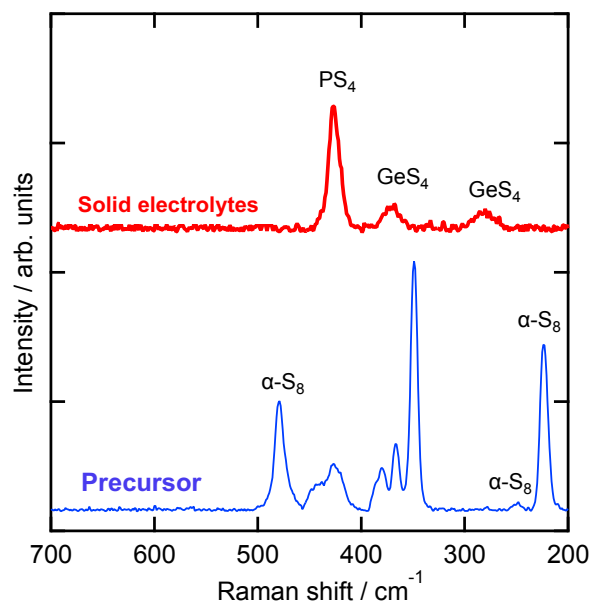

Figure S8. Raman spectrum of Li<sub>10</sub>GeP<sub>2</sub>S<sub>12</sub>-10S precursor and solid electrolyte.

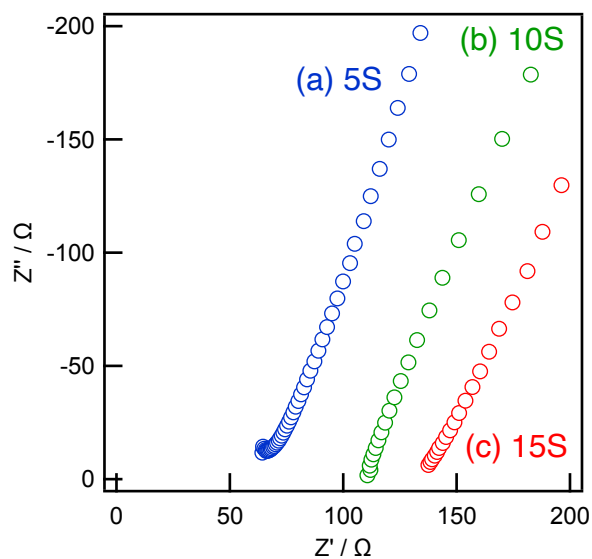

Figure S9. Nyquist plot of Li<sub>10</sub>GeP<sub>2</sub>S<sub>12-x</sub>S solid electrolytes ((a)  $x=5$ , (b)  $x=10$ , (c)  $x=15$ ) synthesised via solution processing with dynamic sulfide radical anions at 25 °C. The samples were heat-treated at 550 °C for 12 h. It is noted that the absolute resistance value depends on the sample thickness.

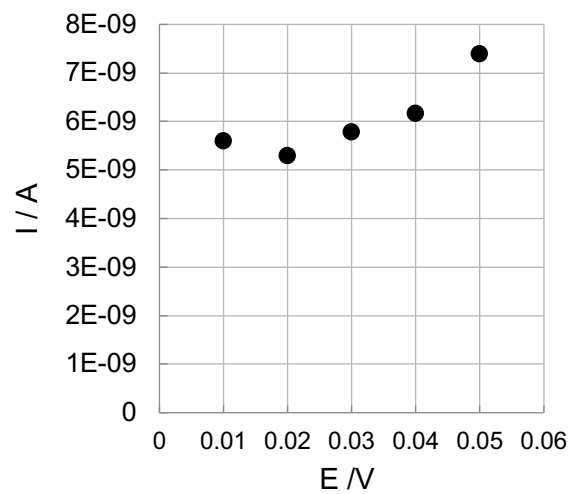

Figure S10. DC polarization test results of  $\text{Li}_{10}\text{GeP}_2\text{S}_{12}\text{-10S}$  solid electrolyte synthesised via solution processing with dynamic sulfide radical anions at 25 °C. The samples were heat-treated at 550 °C for 12 h.



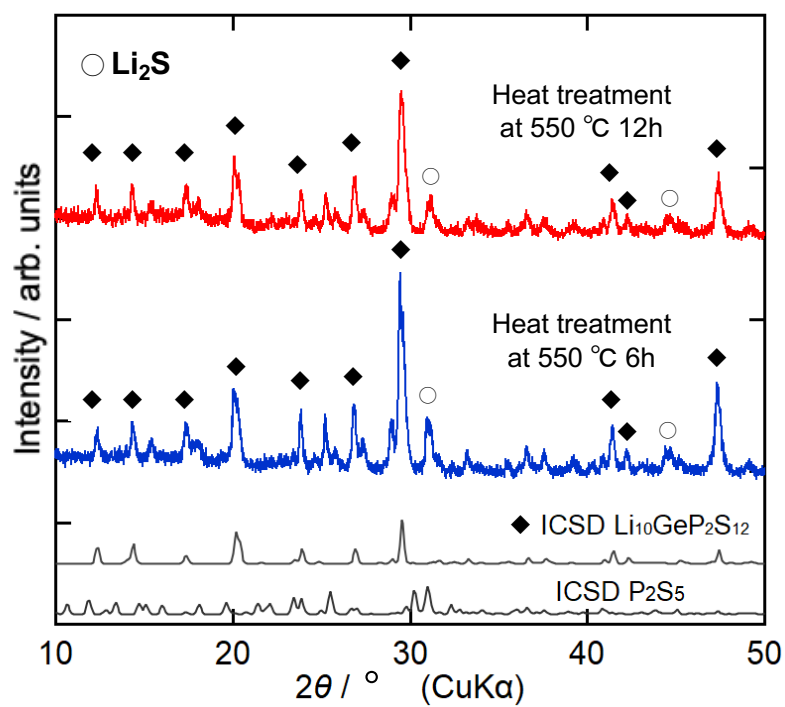

Figure S11. Powder XRD patterns of  $\text{Li}_{10}\text{GeP}_2\text{S}_{12}$ -10S subjected to heat treatment at 550 °C for 6 and 12 h.

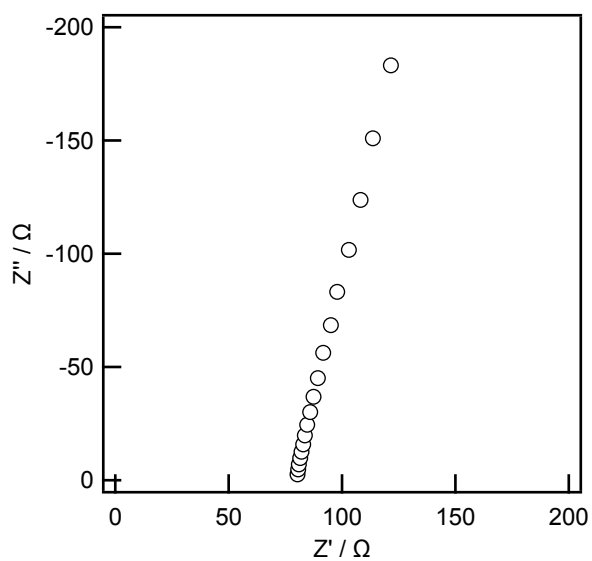

Figure S12. Nyquist plot of  $\text{Li}_{10}\text{GeP}_2\text{S}_{12}-10\text{S}$  solid electrolytes synthesised via solution processing with dynamic sulfide radical anions at 25 °C. The samples were heat-treated at 550 °C for 6 h.

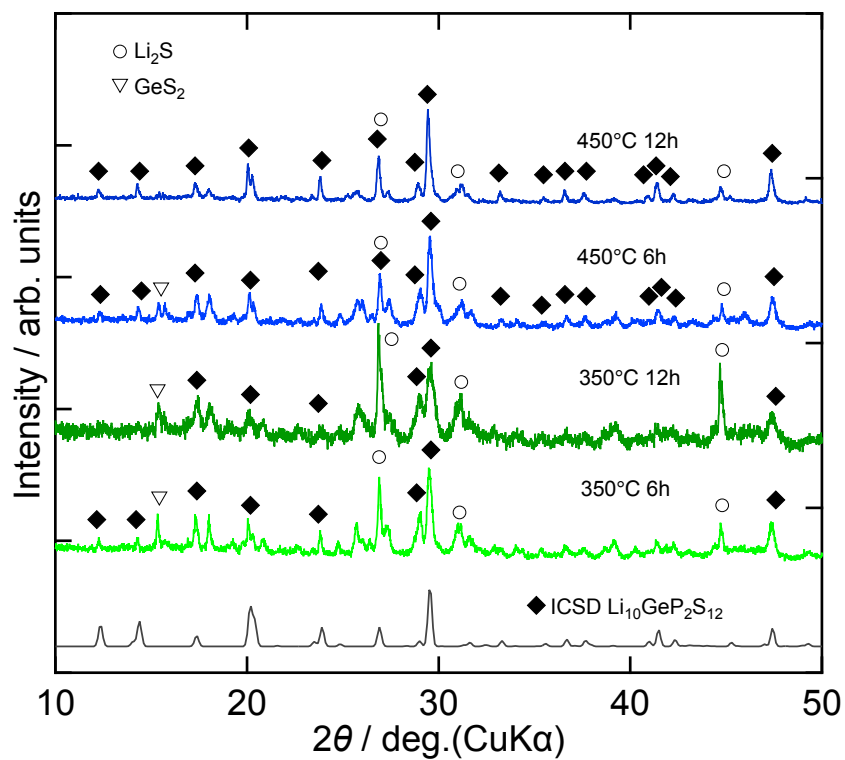

Figure S13. Powder XRD patterns of  $\text{Li}_{10}\text{GeP}_2\text{S}_{12}-10\text{S}$  subjected to heat treatment at 450 and 350 °C for 6h or 12h.

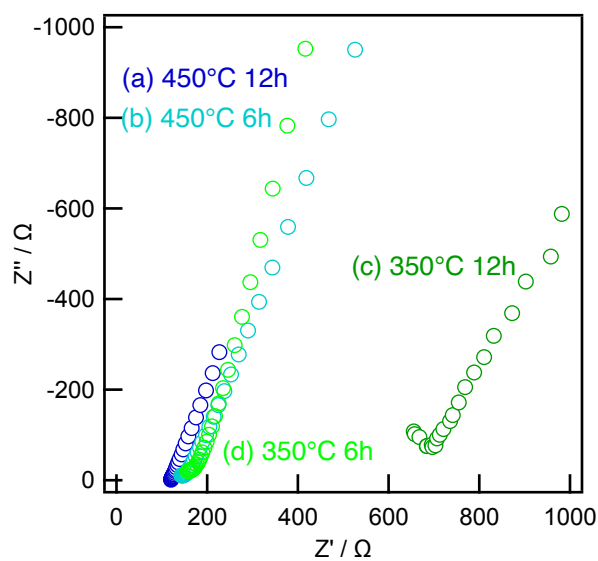

Figure S14. Nyquist plot of  $\text{Li}_{10}\text{GeP}_2\text{S}_{12}\text{-10S}$  solid electrolytes synthesised via solution processing with dynamic sulfide radical anions at 25 °C. The samples were heat-treated at (a) 450 °C 12h, (b) 450 °C 6h, (c) 350 °C 6h and (d) 350 °C 12h. It is noted that the absolute resistance value depends on the sample thickness.

Table S1. Lists of lithium-ion and electronic conductivity of materials obtained under different conditions

| Method                   | Liquid phase shaking  |                      | solution processing with dynamic sulfide radical anions (Basically, composition is $\text{Li}_{10}\text{GeP}_2\text{S}_{12}\text{-10S}$ (denoted as 10S)) |                      |                                                  |                                                  |
|--------------------------|-----------------------|----------------------|-----------------------------------------------------------------------------------------------------------------------------------------------------------|----------------------|--------------------------------------------------|--------------------------------------------------|
| Solvent                  | DME                   | THF                  | ACN+THF+EtOH                                                                                                                                              |                      |                                                  |                                                  |
| Heat treatment           | 550°C12h              |                      | 550°C6h                                                                                                                                                   | 450 °C<br>12h (6h)   | 350 °C<br>12h<br>(6h)                            |                                                  |
| Lithium-ion conductivity | -                     | $1.6 \times 10^{-3}$ | $1.0 \times 10^{-3}$                                                                                                                                      | $1.6 \times 10^{-3}$ | $1.0 \times 10^{-3}$<br>( $0.3 \times 10^{-3}$ ) | $0.2 \times 10^{-3}$<br>( $0.3 \times 10^{-3}$ ) |
| Electron conductivity    | $0.16 \times 10^{-4}$ | $9.5 \times 10^{-7}$ | $9.8 \times 10^{-9}$                                                                                                                                      | -                    | -                                                | -                                                |
